# Supplementary material for: Pathways of excess electron transfer in phenothiazine-tethered DNA containing single-base mismatches
Source: Royal Society of Chemistry journal article supplement (doi:10.1039/b820311c), 2009-01-01
Supplement: b820311c.pdf [file b820311c.pdf]

## Pathways of Excess Electron Transfer in Phenothiazine-tethered DNA Containing Single-base Mismatches

Takeo Ito,\* Akiko Kondo, Tomoyuki Kamashita, Kazuhito Tanabe, Hisatsugu Yamada and  
Sei-ichi Nishimoto\*

*Department of Energy and Hydrocarbon Chemistry, Graduate School of Engineering,  
Kyoto University*

*Kyoto Daigaku Katsura, Nishikyo-ku, Kyoto, 615-8510, Japan. Fax: +81753832504; Tel:  
+81753837054; E-mail:takeoit@scl.kyoto-u.ac.jp*

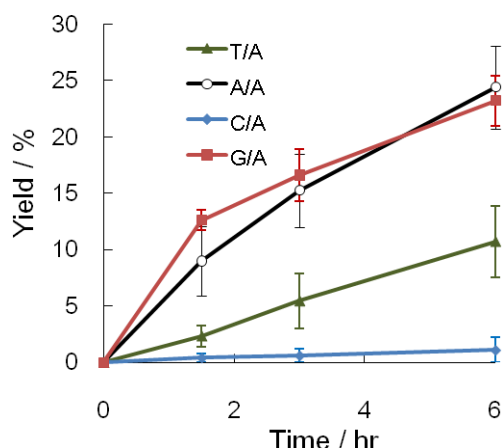

**Figure S1.** Photo-induced excess electron transfer to  $^{Br}U$  from PTZ in  $1 \mu M$  of ODN 1/cODN 1 [X/Y = ( $\blacktriangle$ ) T/A, ( $\circ$ ) A/A, ( $\blacklozenge$ ) C/A, and ( $\blacksquare$ ) G/A] in phosphate buffer (10 mM sodium phosphate, 90 mM NaCl, pH 7.0). Samples were photo-irradiated for 0-6hrs under  $N_2$  conditions. Yields were calculated from the intensity of the cleavage at the 5'-adjacent base C relative to the total intensities. Each analysis was repeated at least three times

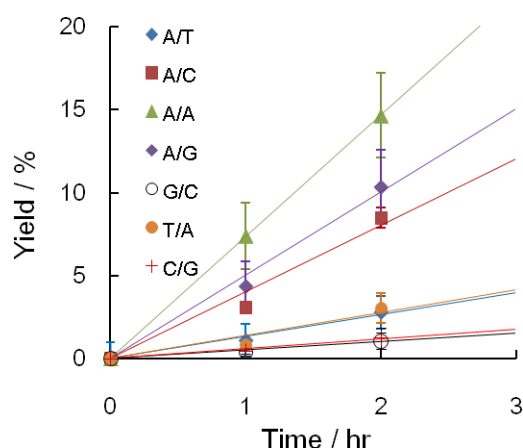

**Figure S2.** Photo-induced excess electron transfer to  $^{Br}U$  from PTZ in  $1 \mu M$  of ODN 2/cODN 2 in phosphate buffer (10 mM sodium phosphate, 90 mM NaCl, pH 7.0). Samples were photo-irradiated for 0-2 hrs under  $N_2$  conditions. Yields were calculated from the intensity of the cleavage at the 5'-adjacent base C relative to the total intensities. Each analysis was repeated at least three times
